# Supplementary material for: Ultrafast transient lens spectroscopy of various C40 carotenoids: lycopene, β-carotene, (3R,3′R)-zeaxanthin, (3R,3′R,6′R)-lutein, echinenone, canthaxanthin, and astaxanthin
Source: Royal Society of Chemistry journal article supplement (doi:10.1039/b506574g), 2005-01-01
Supplement: b506574g.pdf [file b506574g.pdf]

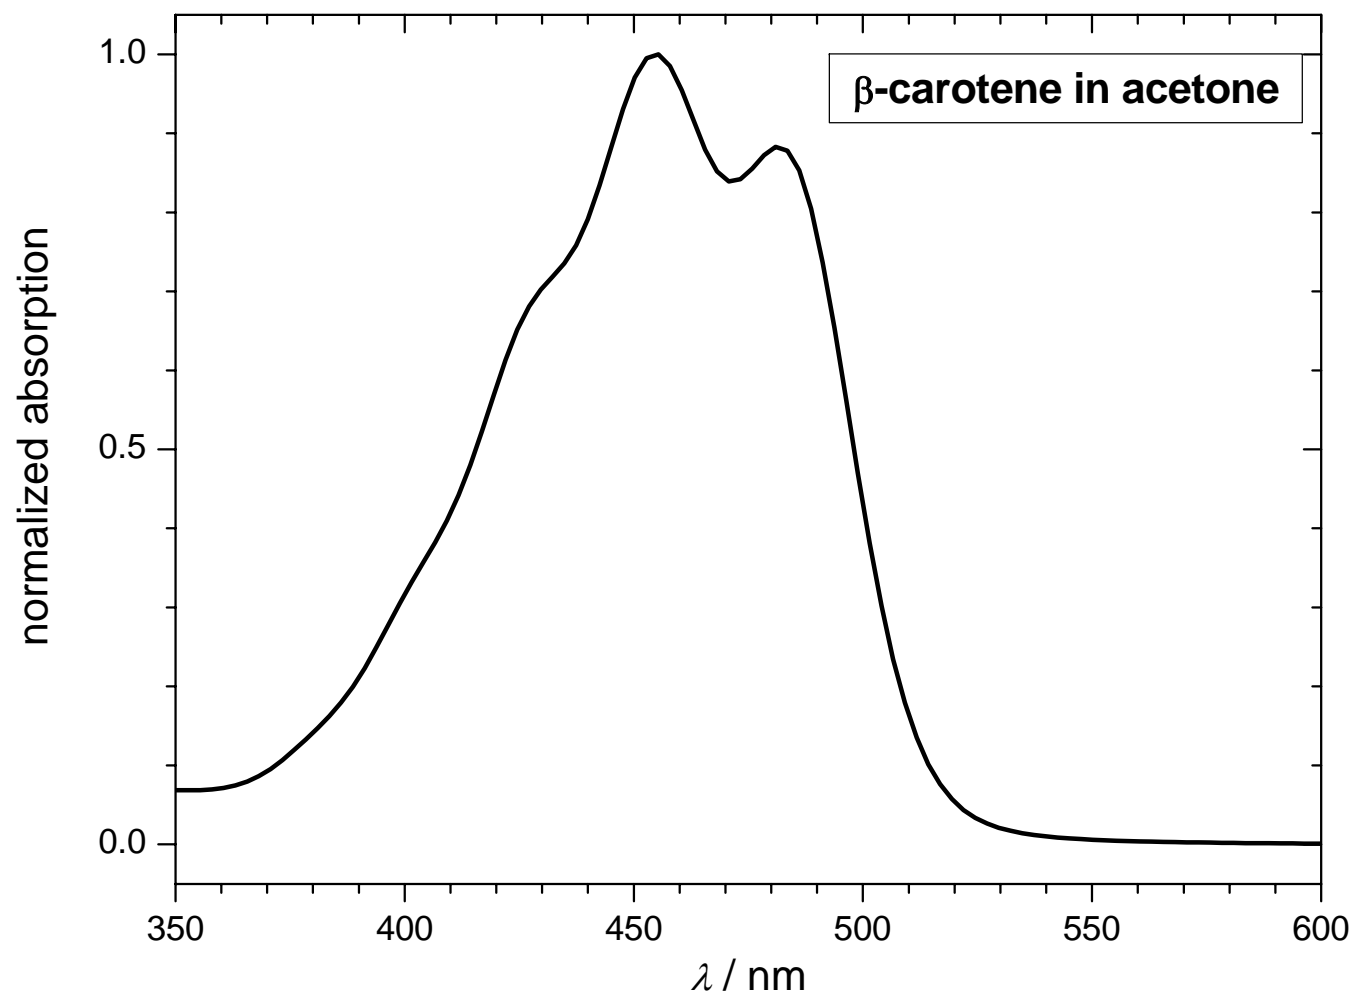

**Fig. S1** Normalized absorption spectrum of  $\beta$ -carotene in acetone at room temperature.

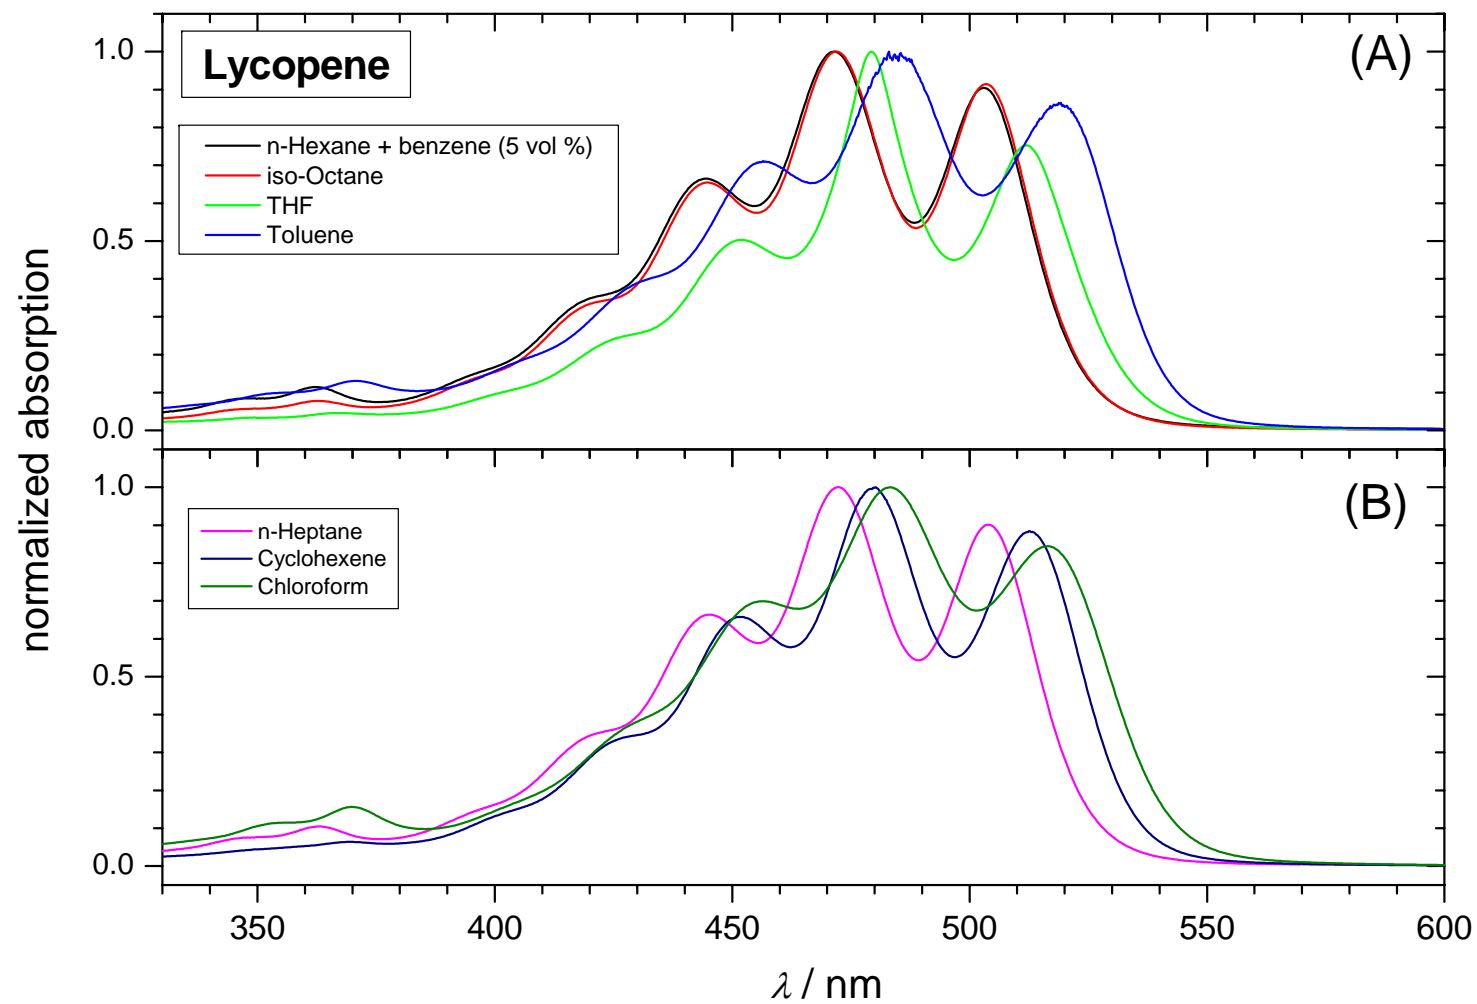

**Fig. S2** Normalized absorption spectra of lycopene in various organic solvents at room temperature.

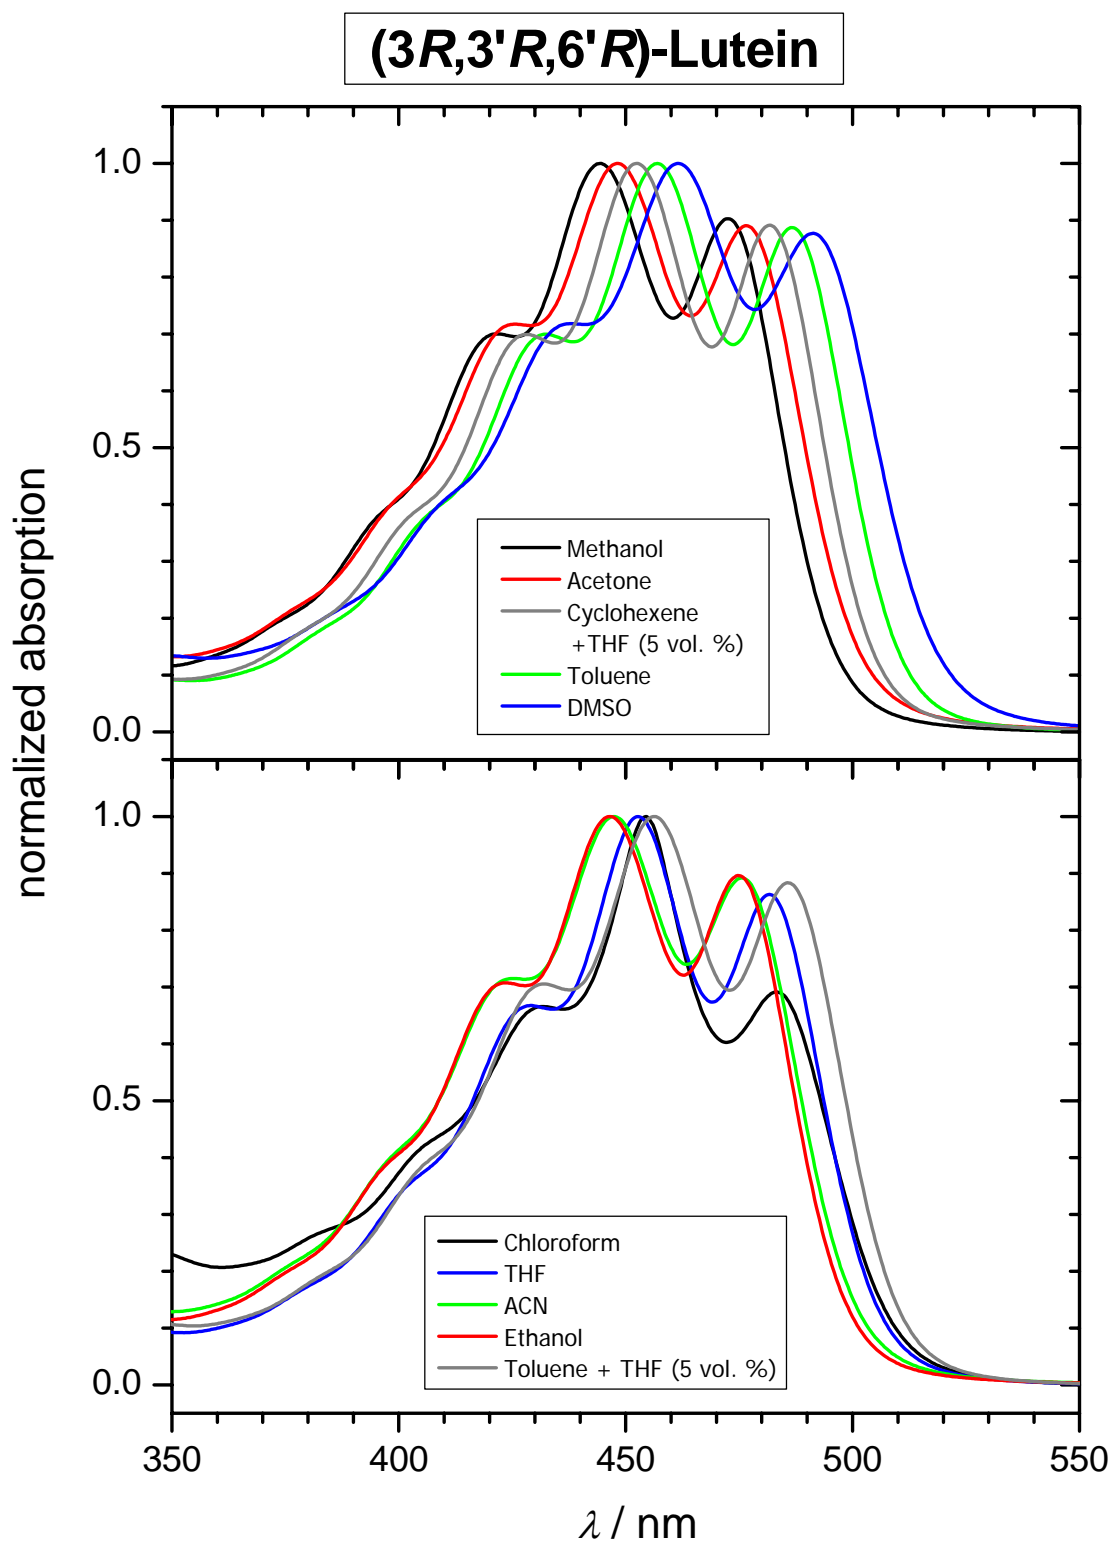

**Fig. S3** Normalized absorption spectra of (3*R*,3'*R*,6'*R*)-lutein in various organic solvents at room temperature.

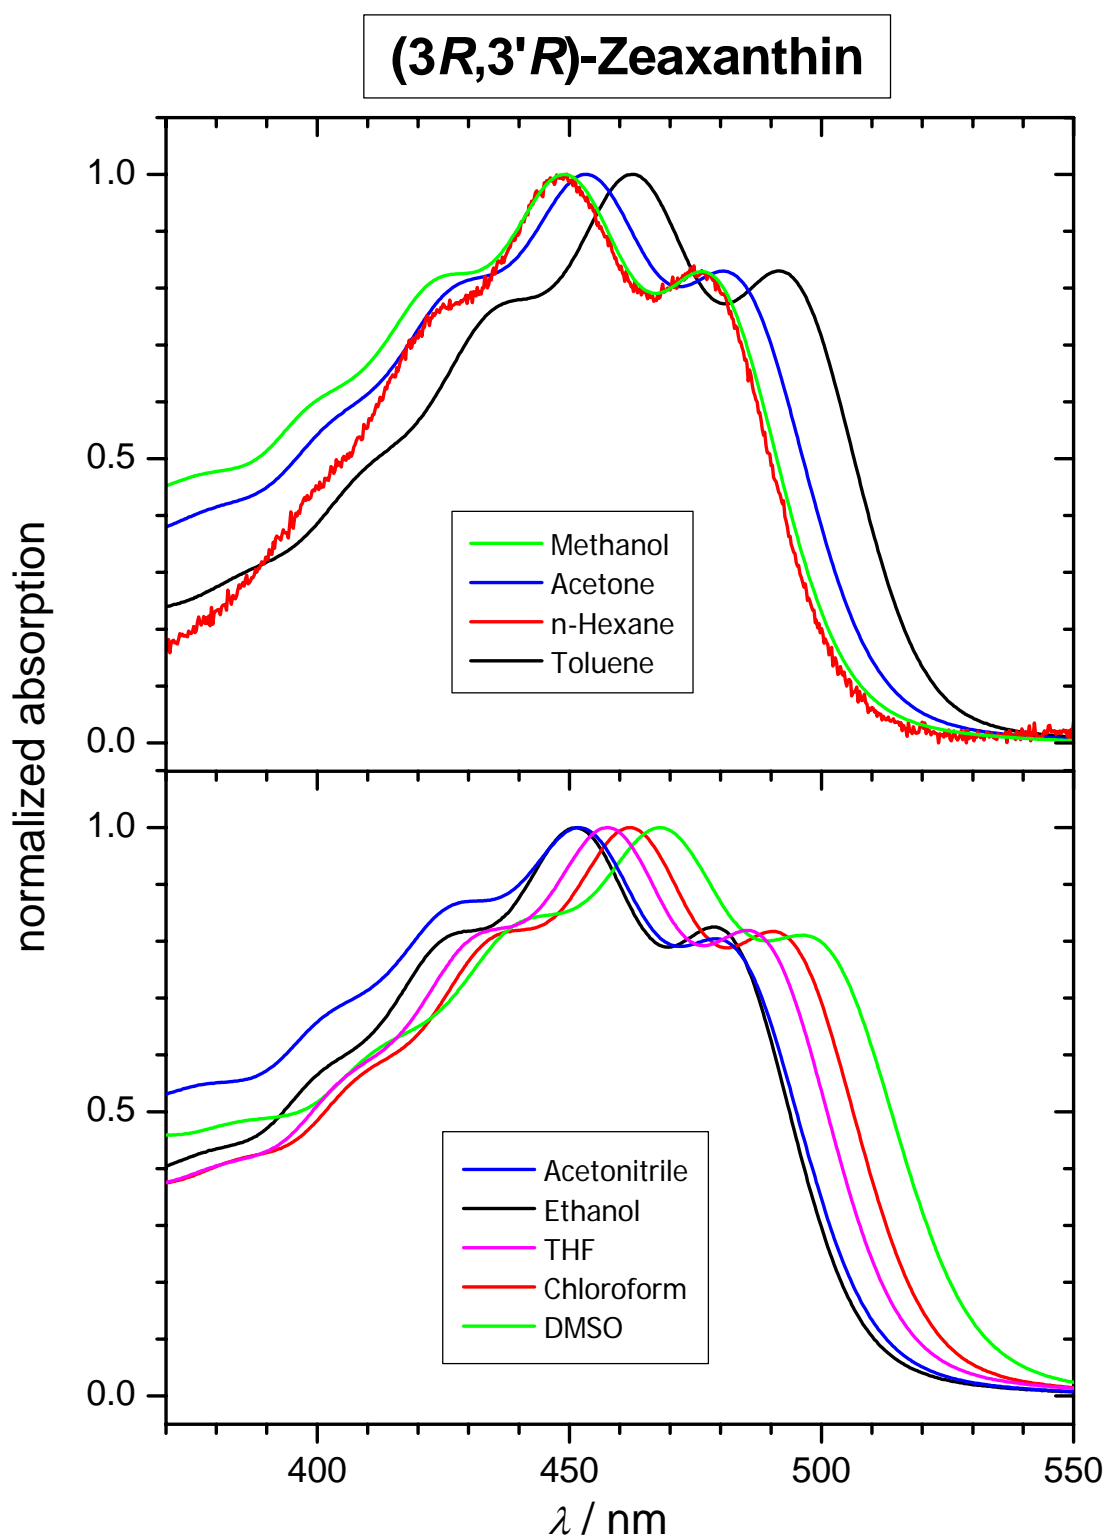

**Fig. S4** Normalized absorption spectra of (3R,3'R)-zeaxanthin in various organic solvents at room temperature.

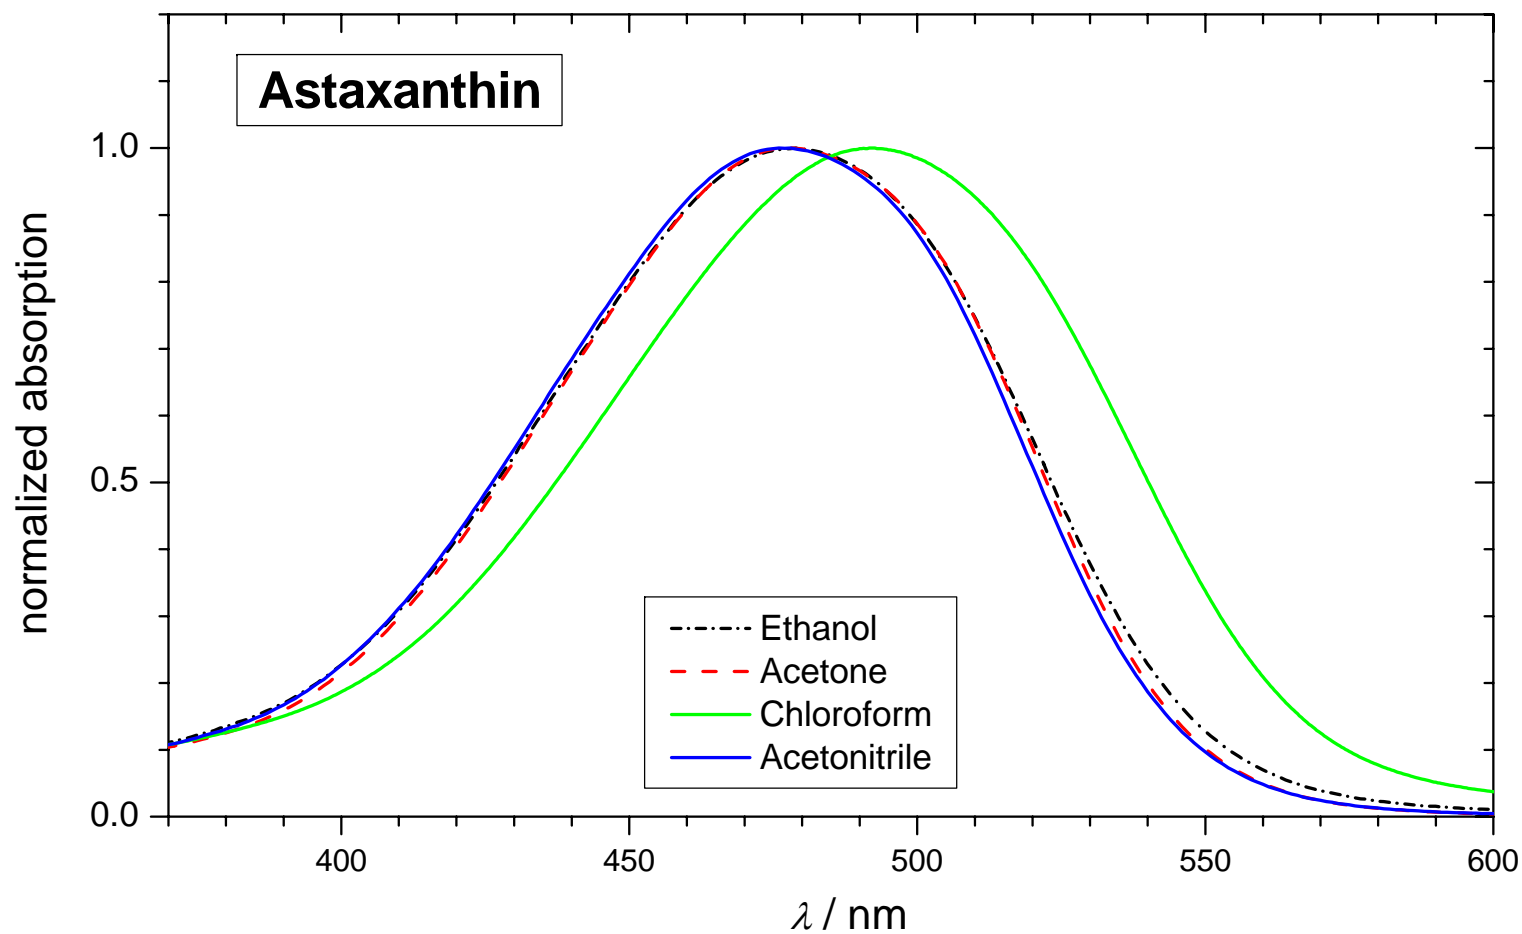

**Fig. S5** Normalized absorption spectra of axtaxanthin in various organic solvents at room temperature (see also Fig. 8(C) for other solvents in the text).
